# Supplementary material
Source: PubMed Central journal article supplement (PMC3419908)
Supplement: bph0166-1643-SD1.pdf [file bph0166-1643-SD1.pdf]

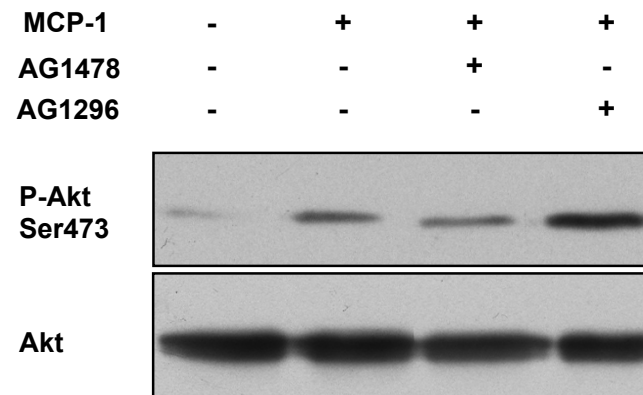

**Supplementary figure 1.** Akt phosphorylation induced by MCP-1 in human aortic SMC does not require tyrosine kinase receptor transactivation.

Human aortic SMC were pre-treated for 30 min with EGFR or PDGFR inhibitors (AG1478 : 300 nM, AG1296 : 10  $\mu$ M) and stimulated with MCP-1 (10 ng·mL<sup>-1</sup>, 5 min). Akt phosphorylation and expression were analyzed with antibodies against phosphorylated Akt (serine 473) and total Akt.

- *Supplementary Figure 1* -

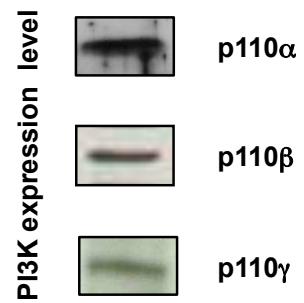

**Supplementary figure 2.** PI3K isoforms are expressed in pig aortic SMC. PI3K isoforms expression was analyzed with specific antibodies against p110 $\alpha$ , p110 $\beta$ , p110 $\gamma$  in pig aortic SMC.

- *Supplementary Figure 2* -

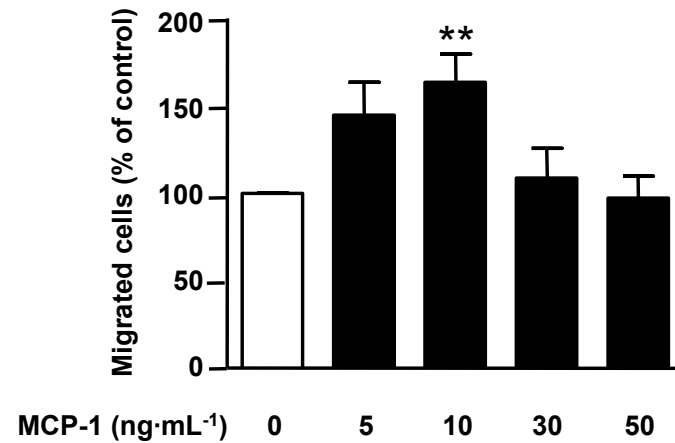

**Supplementary figure 3.** Dose-response of MCP-1 induced aortic SMC migration.

Pig aortic SMC migration was quantified with a wound-healing assay using the Oris™ cell migration kit. Confluent SMC were treated with the indicated concentrations of MCP-1 in serum-free medium and allowed to migrate in the wound surface for 48 h. Migrated cells were stained with DAPI and counted under a fluorescence microscope. Results are expressed as a percentage of control.

\*\* $P < 0.01$ , compared to control.

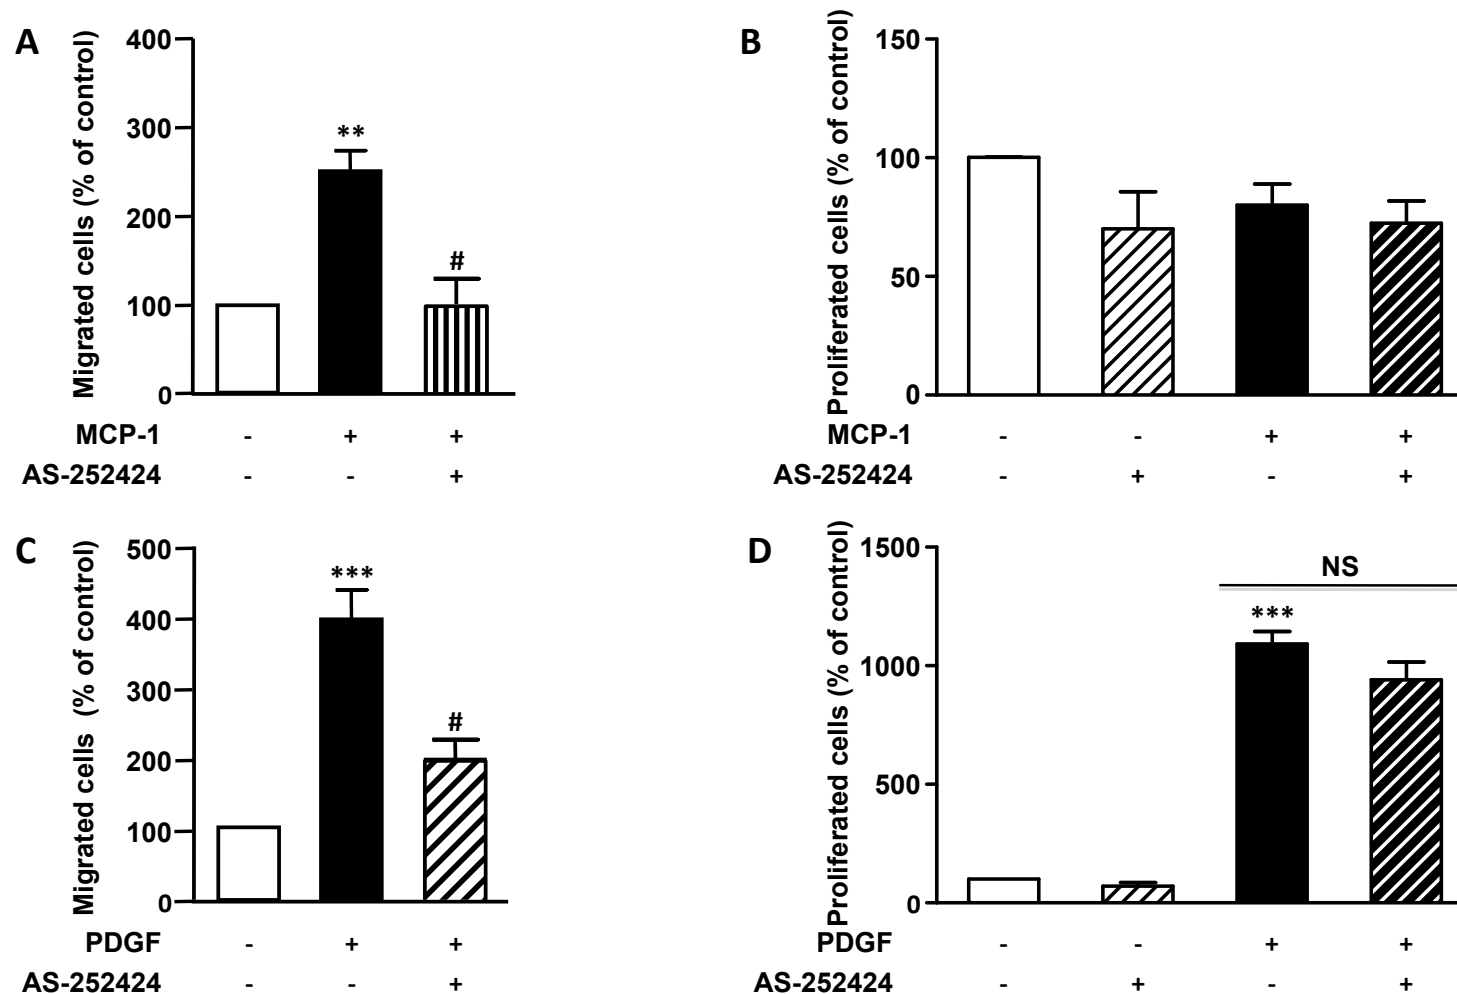

**Supplementary Figure 4.** PI3K $\gamma$  is essential to MCP-1 and PDGF induced aortic SMC migration and not proliferation.

A, C, Pig aortic SMC migration was quantified with a chemotaxis assay using the Boyden chamber cell migration system. SMC were treated with MCP-1 (10 ng·mL<sup>-1</sup>) only or together with a specific PI3K $\gamma$  inhibitor (AS-252424 : 100 nM) (A) and with PDGF (10 ng·mL<sup>-1</sup>) only or together with AS-252424 (100 nM) (C).

\*\* $P$  < 0.01, \*\*\* $P$  < 0.001 compared to control, # $P$  < 0.05 compared to MCP-1 or PDGF stimulation.

B, D, Pig aortic SMC proliferation was quantified with BrdU staining. SMC were treated with MCP-1 (ng·mL<sup>-1</sup>) only or together with AS-252424 (100nM) (B), and with PDGF (10 ng·mL<sup>-1</sup>) only or together with the same specific PI3K $\gamma$  inhibitor (D). \*\*\* $P$  < 0.001 compared to control.

- *Supplementary Figure 4-*

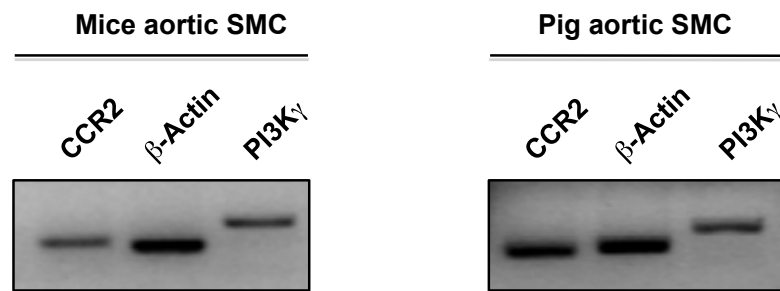

**Supplementary figure 5.** PI3K $\gamma$  and CCR2 are expressed in mouse and pig aortic SMC. Reverse transcription PCR products of CCR2 and PI3K $\gamma$  are analyzed in mouse and pig aortic SMC.  $\beta$ -Actin product was used as a positive control.

## **Supplementary Methods**

### **Boyden chamber migration assay**

Cell migration was assessed by using a modified method of Boyden chamber assay. This method used a fluorescence blocking membrane that blocked wavelengths between 490 and 700 nm. Membrane inserts were coated with collagen ( $50 \mu\text{g}\cdot\text{mL}^{-1}$ ) overnight at  $4^\circ\text{C}$ . Then, nonspecific adherence was blocked by incubation with 0.5 % BSA in PBS for 1 h at  $37^\circ\text{C}$ . SMC were labeled with a lipophilic carbocyanine, CM-Dil ( $10 \mu\text{M}$ ), in DMEM containing 0.2 % BSA 24 h before carrying out the migration assay. Labeled VSMC ( $5\times 10^4$ ) suspended in migration medium (DMEM without phenol red containing 0.2 % BSA) were incubated for 30 min at  $37^\circ\text{C}$  with or without PI3K $\gamma$  inhibitor AS-252424 ( $100 \text{ nM}$ ) and then transferred to the upper chamber. MCP-1 ( $10 \text{ ng}\cdot\text{mL}^{-1}$ ) or PDGF ( $10 \text{ ng}\cdot\text{mL}^{-1}$ ) was added to the lower chamber. Fluorescence of migrating cells was measured at 6 h on a plate reader at excitation/emission wavelengths of 544/590 nm. We checked that fluorescence was linearly related to cell number in the range used for these experiments.

### **BrdU incorporation assay**

VSMC were seeded in 6 well plates until attachment. Cells were incubated for 48 h with growth medium (DMEM containing 10 % FCS), or blocking medium (DMEM containing 0,2 % BSA) supplemented or not with agonists (MCP-1,  $10 \text{ ng}\cdot\text{mL}^{-1}$  or PDGF,  $10 \text{ ng}\cdot\text{mL}^{-1}$ ) and PI3K $\gamma$  inhibitor AS-252424 ( $100 \text{ nM}$ ). BrdU ( $10 \mu\text{M}$ ), a thymidine analog, was added during 24 h into the wells. For anti-BrdU immunostaining, cells were washed two times with PBS, fixed with ice-cold 80 % ethanol for 20 min, then 100 % ethanol for 20 min. Cells were permeabilized with 0,25 % Triton X-100 in PBS for 20 min. To allow access for BrdU antibodies, DNA was denatured through the action of 4 M HCl for 20 min. HCl was neutralized by carefully washing three times with PBS. Non specific sites were saturated with PBS containing 0,5 % BSA and 0,1 % Tween-20 for 20 min before incubation with FITC-conjugated anti-BrdU antibody (eBioscience) overnight at  $4^\circ\text{C}$ . Cells stained with anti-BrdU antibody were counted using fluorescence microscope (ApoTome, Zeiss).

### **Reverse transcription PCR and PCR**

Total RNA from pig or mouse SMC was extracted with Trizol reagent (Invitrogen). Phase separation was performed with chloroform and RNA precipitation with isopropanol. RNA

concentrations were determined using a spectrophotometer. One microgram of total RNA was used for cDNA synthesis with hexameres. The cDNA was amplified by PCR with Taq platinum (Invitrogen). The primers to amplify CCR2 RNA,  $\beta$ -Actin RNA and PI3K $\gamma$  RNA were designed using the Primer Express software. The primers sequences used are summarized in the following table:

|                 | <i>Sus scrofa</i> Primers                                                 | <i>Mus musculus</i> Primers                                            |
|-----------------|---------------------------------------------------------------------------|------------------------------------------------------------------------|
| CCR2            | 5'-TTGTGTGACCCAAGAGAGACTTACG-3' (F)<br>5'-GTTACAGCCAAACCATCCTAAAGC-3' (R) | 5'-AAGGGGCCACCACACCGTATGA-3' (F)<br>5'-GCAGCATAGTGAGCCCAGAATGGT-3' (R) |
| PI3K $\gamma$   | 5'-CCCACTCACAGCTGAAGACA-3' (F)<br>5'-CAGCAGAAATCTGGCTAGGG-3' (R)          | 5'-GGCCCAAAGCAATGTAGTGT-3' (F)<br>5'-ACATGGTGGACACACGAGAA-3' (R)       |
| $\beta$ -actine | 5'-AGAGCGCAAGTACTCCGTGT-3' (F)<br>5'-AAAGCCATGCCAATCTCATC-3' (R)          | 5'-AGCCATGTACGTAGCCATCC-3' (F)<br>5'-CTCTCAGCTGTGGTGGTGAA-3' (R)       |

After amplification, the samples were separated on an agarose gel and RT-PCR products for CCR2, PI3K $\gamma$ , and  $\beta$ -actine were visualized by ethidium bromide fluorescence.
